# Supplementary material
Source: MDPI journal article supplement (https://www.mdpi.com/2073-445X/12/6/1150)
Supplement: s1 [file s1]

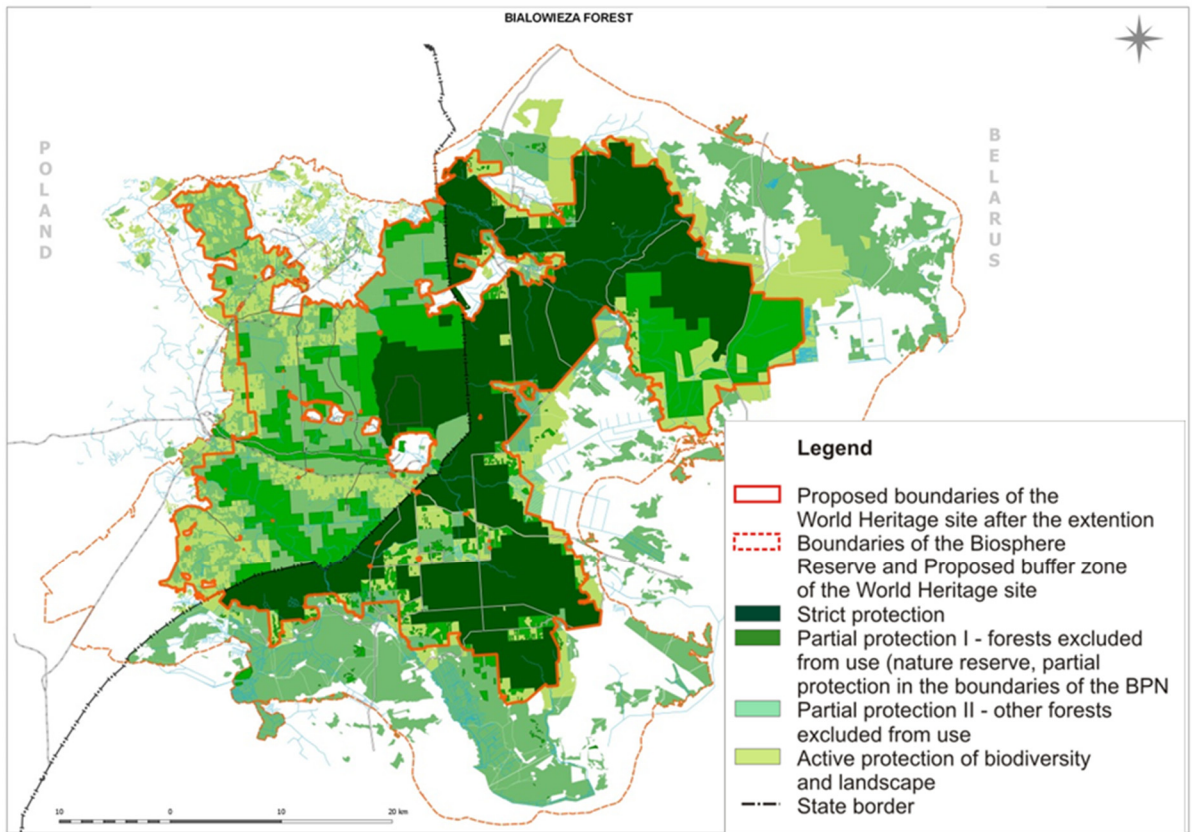

**Figure S1.** Map of the Białowieża Forest massif with the borders of different denominations: Biosphere Reserve, World Heritage Site, and zones for conservation and use [60].
